# Supplementary material for: Anion recognition by halogen bonding and hydrogen bonding bis(triazole)-imidazolium [2]rotaxanes
Source: Royal Society of Chemistry journal article supplement (doi:10.1039/d1dt02414k), 2021-01-01
Supplement: d1dt02414k1.pdf [file d1dt02414k1.pdf]

Supplementary Information for

**Anion recognition by halogen bonding and hydrogen bonding bis-triazole-imidazolium [2]rotaxanes**

Grace Turner,<sup>[a]</sup> Andrew Docker <sup>[a]</sup> and Paul D. Beer(s)<sup>\*[a]</sup>

[a] G. Turner, A. Docker, Prof. P. D. Beer, Department of Chemistry, University of Oxford, Chemistry Research Laboratory, Mansfield Road, Oxford OX1 3TA  
E-mail: paul.beer@chem.ox.ac.uk

## Materials and methods

All solvents and reagents were purchased from commercial suppliers and used as received unless otherwise stated. Dry solvents were obtained by purging with nitrogen and then passing through an MBraun MPSP-800 column. H<sub>2</sub>O was de-ionized and micro filtered using a Milli-Q® Millipore machine. Column chromatography was carried out on Merck® silica gel 60 under a positive pressure of nitrogen. Routine NMR spectra were recorded on either a Varian Mercury 300, a Bruker AVIII 400 or a Bruker AVIII 500 spectrometer with <sup>1</sup>H NMR titrations recorded on a Bruker AVIII 500 spectrometer. Chemical shifts are quoted in parts per million relative to the residual solvent peak. Mass spectra were recorded on a Bruker μTOF spectrometer. Triethylamine was distilled from and stored over potassium hydroxide. Tris[(1-benzyl-1H-1,2,3-triazol-4-yl)methyl]amine (TBTA). The following compounds were prepared according to literature procedures **1**,<sup>[1]</sup> **2** <sup>[2]</sup> and **9**.<sup>[3]</sup>

### Anion Exchange Protocol

The charged species was dissolved in a CH<sub>2</sub>Cl<sub>2</sub> solution (ca. 50 ml), to which was added an aqueous solution of 0.1 M NH<sub>4</sub>X (ca. 50 ml) and the mixture was shaken vigorously in a separating funnel. The organic phase was separated and the washing procedure was repeated 7 more times. After the final aqueous washing the organic phase was washed with water (50 ml), the organic phase collected, dried over MgSO<sub>4</sub> and the solvent was removed in vacuo.

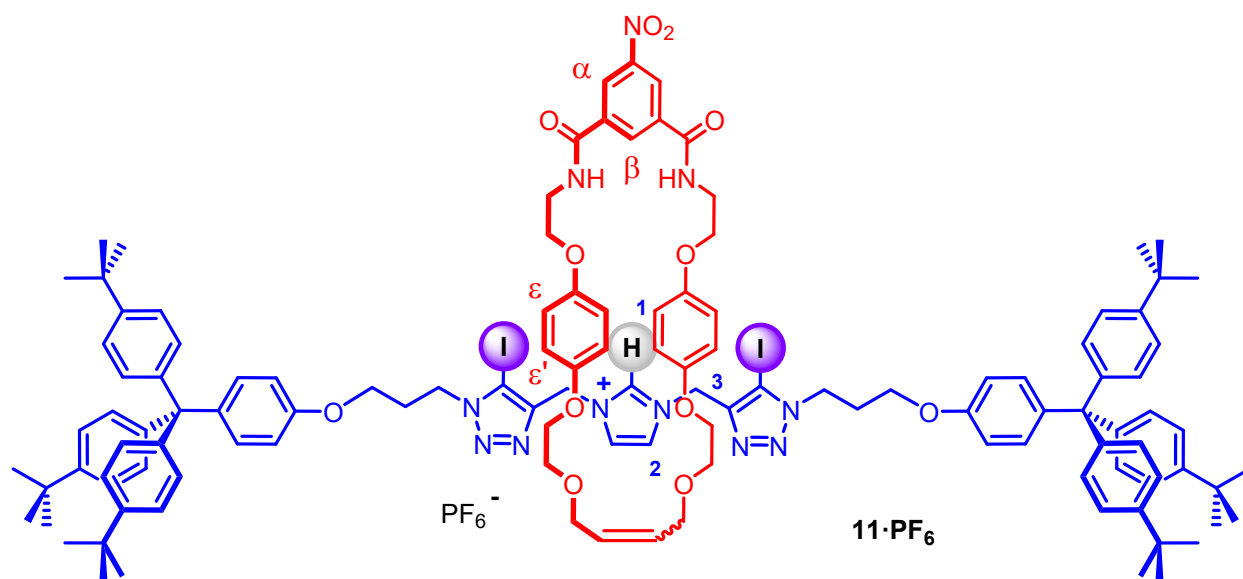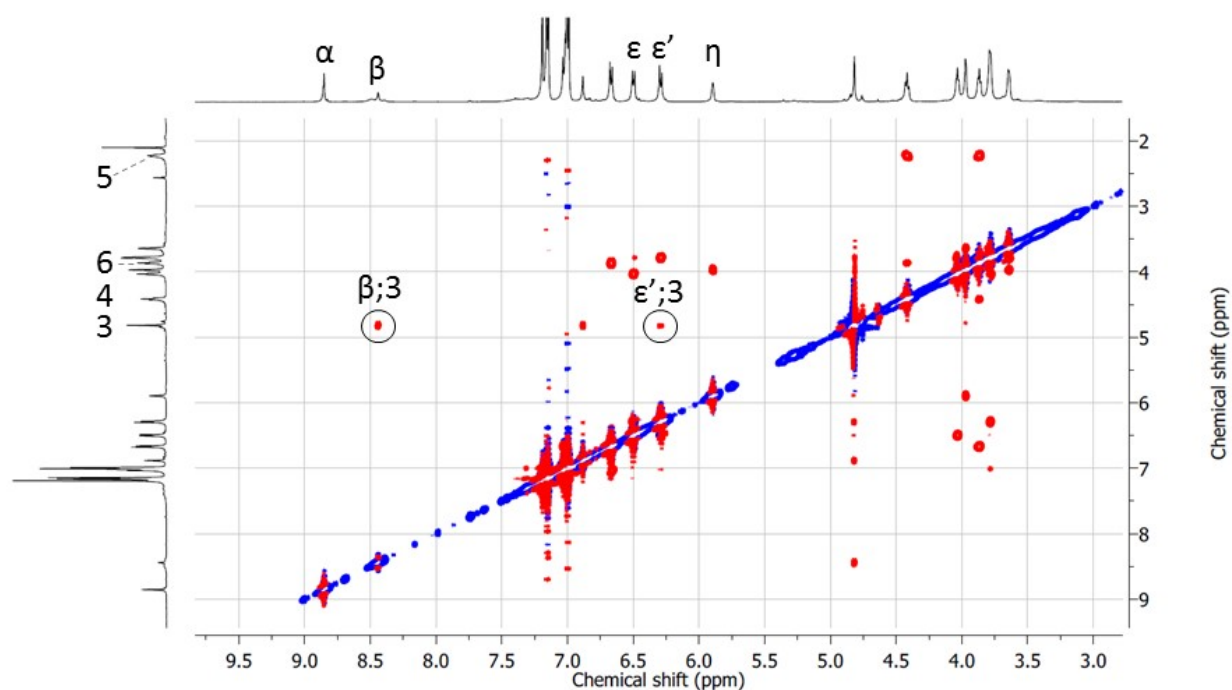

Figure S1. Truncated 2D ROESY NMR spectrum of rotaxane  $\mathbf{11} \cdot \text{PF}_6$  showing selected through-space  $^1\text{H}$ - $^1\text{H}$  correlations indicative of an interlocked assembly ( $\text{CDCl}_3$ , 500 MHz, 298 K).

**3**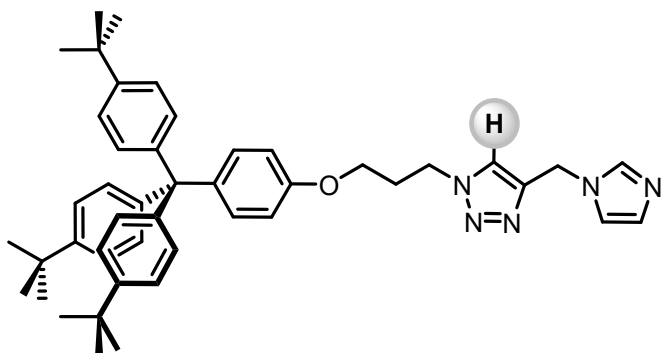

Stopper azide **2** (0.660 g, 1.12 mmol),  $[\text{Cu}(\text{MeCN})_4][\text{PF}_6]$  (0.070 g, 0.188 mmol) and TBTA (cat. amount) were dissolved in dry degassed DCM (10 mL). Imidazole-alkyne **1** (0.100 g, 0.942 mmol) and DIPEA (cat. amount) were added. The mixture was stirred at room temperature under  $\text{N}_2$  for 18 hours, after which, the reaction mixture was diluted with DCM (80 mL). The organics were washed with  $\text{NH}_4\text{OH}_{(\text{aq})}$  ( $3 \times 40$  mL),  $\text{H}_2\text{O}$  (40 mL) and brine ( $2 \times 40$  mL) and dried over  $\text{MgSO}_4$ . The solvent was removed *in vacuo*. Purification *via* silica gel column chromatography (DCM/MeOH 98:2) yielded **3** as a white powder (0.600 g, 92%).

$^1\text{H NMR}$  (400 MHz;  $\text{CDCl}_3$ )  $\delta$  (ppm): 7.56 (1H, s, NCHN-imidazole), 7.38 (1H, s, CH-triazole), 7.20-7.25 (6H, m, ArH), 7.06-7.14 (8H, m, ArH), 7.05 (1H, br. s, NCH-imidazole), 6.96 (1H, s, NCH-imidazole), 6.70-6.76 (2H, m, ArH), 5.21 (2H, s,  $\text{NCH}_2$ -methylene), 4.54 (2H, t,  $J = 6.9$  Hz,  $\text{NCH}_2$ ), 3.91 (2H, t,  $J = 5.7$  Hz,  $\text{OCH}_2$ ), 2.32-2.38 (2H, m,  $\text{OCH}_2\text{CH}_2$ ), 1.30 (27H, s, *tert*- $\text{CH}_3$ );  $^{13}\text{C NMR}$  (126 MHz;  $\text{CDCl}_3$ )  $\delta$  (ppm): 156.24, 148.54, 144.16, 143.66, 140.42, 132.52, 130.83, 130.19, 128.36, 124.22, 122.60, 113.04, 80.71, 63.88, 63.20, 47.56, 42.50, 34.45, 31.53, 30.03; **HRESI-MS** (pos)  $\text{C}_{46}\text{H}_{56}\text{ON}_5$   $m/z$ :  $[\text{M}+\text{H}]^+$  calc. 694.44794, found 694.44748.

4

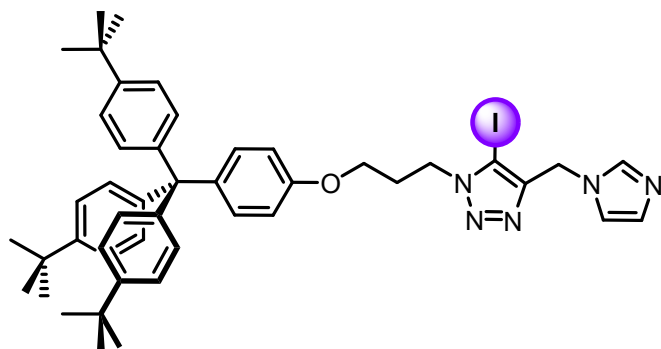

Stopper azide **2** (0.304 g, 0.517 mmol) was dissolved in dry degassed THF (2 mL) and the reaction vessel covered with foil.  $\text{Cu}(\text{ClO}_4)_2 \cdot 6\text{H}_2\text{O}$  (0.349 g, 0.940 mmol) and NaI (0.282 g, 1.88 mmol) were added and stirred under  $\text{N}_2$  for 5 mins. TBTA (0.025 g, 0.047 mmol) was added and stirred under  $\text{N}_2$  for 5 mins. DBU (0.071 g, 0.466 mmol) and imidazole–alkyne **1** (0.050 g, 0.466 mmol) were added in order and the mixture was stirred at room temperature for 18 hours, after which, the reaction mixture was diluted with DCM (50 mL). The organics were washed with  $\text{NH}_4\text{OH}_{(\text{aq})}$  (3 × 30 mL),  $\text{H}_2\text{O}$  (30 mL) and brine (2 × 30 mL) and dried over  $\text{MgSO}_4$ . The solvent was removed *in vacuo*. Purification *via* silica gel column chromatography (DCM/MeOH 98:2) yielded **4** as a white powder (0.350 g, 91%).

$^1\text{H NMR}$  (500 MHz;  $\text{CDCl}_3$ )  $\delta$  (ppm): 7.63 (1H, s, NCHN-*imidazole*), 7.20-7.26 (6H, m, ArH), 7.06-7.10 (8H, m, ArH), 7.05-6.99 (2H, m, NCH-*imidazole*), 6.70-6.76 (2H, m, ArH), 5.17 (2H, s, NCH<sub>2</sub>-*methylene*), 4.57 (2H, t,  $J = 7.0$  Hz, NCH<sub>2</sub>), 3.99 (2H, t,  $J = 5.7$  Hz, OCH<sub>2</sub>), 2.36-2.41 (2H, m, OCH<sub>2</sub>CH<sub>2</sub>), 1.30 (27H, s, *tert*-CH<sub>3</sub>);  $^{13}\text{C NMR}$  (126 MHz;  $\text{CDCl}_3$ )  $\delta$  (ppm): 156.19, 148.46, 146.67, 144.16, 140.25, 132.43, 130.81, 129.98, 128.10, 124.18, 119.13, 113.15, 80.30, 63.90, 63.17, 48.18, 42.35, 34.41, 31.50, 29.67; **HRESI-MS** (pos)  $\text{C}_{46}\text{H}_{55}\text{ON}_5\text{I}$   $m/z$ :  $[\text{M}+\text{H}]^+$  *calc.* 820.34458, *found* 820.34387.

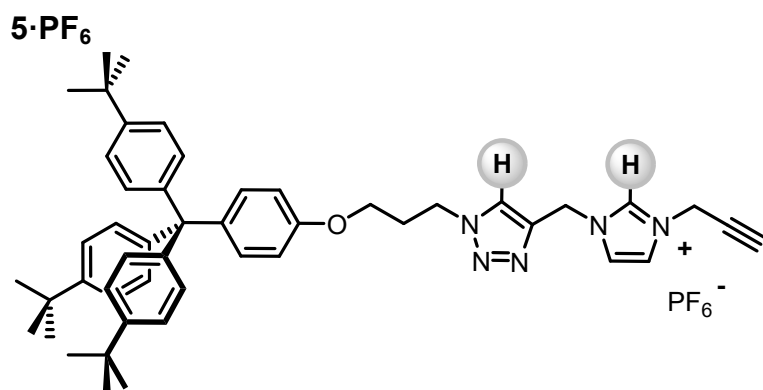

**3** (0.350 g, 0.50 mmol) was suspended in acetone (10 mL) and propargyl bromide (0.28 mL, 2.50 mmol) added. The reaction mixture was heated under microwave irradiation at 140 °C for 75 mins and the resulting precipitate filtered to produce imidazolium–alkyne **5·Br** (0.345 g, 85%), and subjected to the anion exchange protocol.

**<sup>1</sup>H NMR** (400 MHz; CDCl<sub>3</sub>) δ (ppm): 10.68 (1H, t, <sup>4</sup>J = 1.7 Hz, NCHN-*imidazole*), 8.54 (1H, s, CH-*triazole*), 7.68 (1H, t, <sup>4</sup>J = 1.8 Hz, NCH-*imidazole*), 7.35 (1H, t, <sup>4</sup>J = 1.8 Hz, NCH-*imidazole*), 7.25-7.17 (6H, m, ArH), 7.12-6.99 (8H, m, ArH), 6.78-6.59 (2H, m, OArH), 5.84 (2H, s, *imidazolium-CH<sub>2</sub>-triazole*) 5.16 (2H, d, <sup>4</sup>J = 2.6 Hz, CH<sub>2</sub>-*alkyne*), 4.58 (2H, t, J = 7.2 Hz, NCH<sub>2</sub>CH<sub>2</sub>), 3.97 (2H, t, J = 5.7 Hz, OCH<sub>2</sub>), 2.68 (1H, t, <sup>4</sup>J = 2.6 Hz, CH-*alkyne*), 2.46-2.29 (2H, m, OCH<sub>2</sub>CH<sub>2</sub>), 1.29 (27H, s, *tert-CH<sub>3</sub>*); **<sup>13</sup>C NMR** (126 MHz; CDCl<sub>3</sub>) δ (ppm): 156.34, 148.46, 144.19, 140.21, 139.96, 137.23, 132.42, 130.83, 125.84, 124.20, 122.88, 121.19, 113.08, 78.54, 73.42, 64.22, 63.18, 47.98, 44.78, 40.05, 34.43, 31.52, 30.10.; **HRESI-MS** (pos) C<sub>49</sub>H<sub>58</sub>ON<sub>5</sub><sup>+</sup> *m/z*: [M-Br]<sup>+</sup> *calc.* 732.46359, *found* 732.46270.

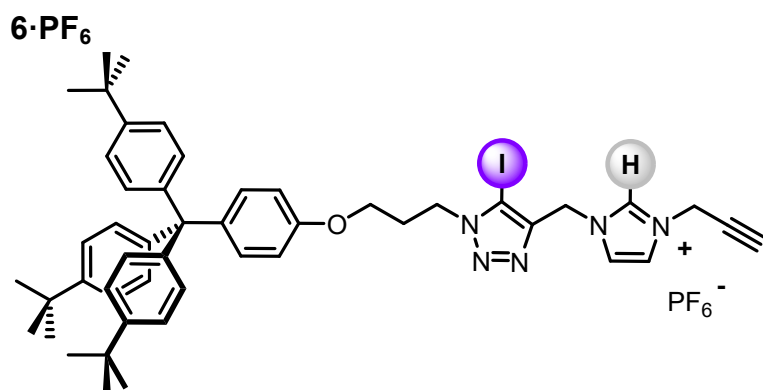

**4** (0.200 g, 0.244 mmol) was suspended in acetone (10 mL) and propargyl bromide (0.11 mL, 1.22 mmol) added. The reaction mixture was heated under microwave irradiation at 140 °C for 75 mins and the resulting precipitate filtered to produce imidazolium–alkyne **6**·Br (0.149 g, 65%) and subjected to the anion exchange protocol.

<sup>1</sup>H NMR (400 MHz; CDCl<sub>3</sub>) δ (ppm): 10.78 (1H, s, NCHN-*imidazolium*), 7.48 (1H, t, *J* = 1.8 Hz, NCH-*imidazole*), 7.43 (1H, t, *J* = 1.8 Hz, NCH-*imidazole*), 7.19-7.25 (6H, m, ArH), 7.05-7.10 (8H, m, ArH), 6.70-6.73 (2H, m, OArH), 5.65 (2H, s, *imidazolium-CH<sub>2</sub>-triazole*), 5.38 (2H, d, <sup>4</sup>*J* = 2.6 Hz, CH<sub>2</sub>-*alkyne*), 4.59 (2H, t, *J* = 7.0 Hz, NCH<sub>2</sub>), 3.98 (2H, t, *J* = 5.6 Hz, OCH<sub>2</sub>), 2.65 (1H, t, <sup>4</sup>*J* = 2.6 Hz, CH-*alkyne*), 2.42-2.36 (2H, m, OCH<sub>2</sub>CH<sub>2</sub>), 1.29 (27H, s, CH<sub>3</sub>); <sup>13</sup>C NMR (126 MHz; CDCl<sub>3</sub>) δ (ppm): 156.16, 148.36, 144.05, 143.59, 140.14, 137.28, 132.31, 130.69, 124.08, 122.21, 121.73, 113.01, 85.62, 78.16, 73.73, 63.99, 63.05, 48.40, 45.47, 40.18, 34.31, 31.39, 29.52; HRESI-MS (pos.) C<sub>49</sub>H<sub>57</sub>ON<sub>5</sub>I<sup>+</sup> *m/z*: [M-Br]<sup>+</sup> *calc.* 858.36023, *found* 858.35943.

## 7·Cl

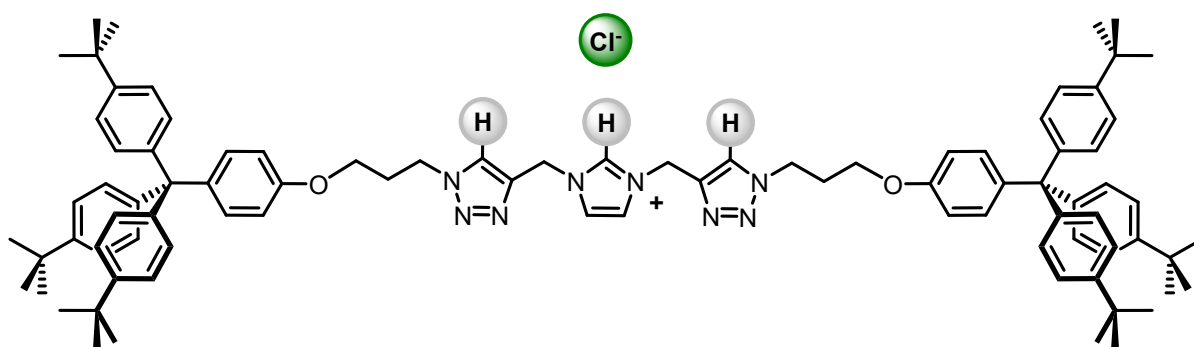

**5-PF6** (0.100 g, 0.14 mmol) and stopper azide **2** (0.096 g, 0.16 mmol) were dissolved in dry DCM (4 mL). TBTA (0.014 g, 0.027 mmol) followed by  $[\text{Cu}(\text{MeCN})_4][\text{PF}_6]$  (0.011 g, 0.027 mmol) and DIPEA (0.026 g, 0.20 mmol) were added and the reaction mixture was stirred at room temperature for 18 hours. The reaction was diluted with DCM (20 mL) and washed with  $\text{NH}_4\text{OH}_{(\text{aq})}$  ( $3 \times 20$  mL) and brine ( $2 \times 15$  mL) and dried over anhydrous  $\text{MgSO}_4$  and filtered. To the crude reaction mixture TFA (0.5 mL) was added and stirred for 30 mins. The solvent and excess TFA were removed *in vacuo* and the reaction mixture was purified *via* silica gel column chromatography (DCM/MeOH 95:5) and subjected to the anion exchange protocol. The solvent was removed *in vacuo* to afford HB imidazolium–bis(triazole) axle **7·Cl** (0.086 g, 42%).

$^1\text{H NMR}$  (400 MHz;  $\text{CDCl}_3/\text{CD}_3\text{OD}$  1:1)  $\delta$  (ppm): 8.95 (1H, s, NCHN-imidazolium), 8.02 (2H, s, NCH-imidazolium), 7.50 (2H, s, CH-triazole), 7.27-7.12 (12H, m, ArH), 7.03 (16H, m, ArH), 6.70-6.65 (4H, m, OArH), 5.43 (4H, s, NCH<sub>2</sub>-methylene), 4.56 (2H, t,  $J = 7.2$  Hz, NCH<sub>2</sub>CH<sub>2</sub>), 3.93 (4H, t,  $J = 5.7$  Hz, OCH<sub>2</sub>), 2.41-2.27 (4H, m, OCH<sub>2</sub>CH<sub>2</sub>), 1.25 (54H, s, tert-CH<sub>3</sub>);  $^{13}\text{C NMR}$  (126 MHz;  $\text{CDCl}_3$ )  $\delta$  (ppm): 156.29, 148.89, 148.46, 144.18, 140.32, 140.22, 132.48, 130.84, 124.21, 113.06, 110.90, 104.79, 64.06, 63.19, 47.71, 34.44, 31.52, 30.03, 29.85; **HRESI-MS** (pos)  $\text{C}_{89}\text{H}_{107}\text{O}_2\text{N}_8^+$   $m/z$ :  $[\text{M}-\text{Cl}]^+$  *calc.* 1320.85451, *found* 1320.85507.



**8·Cl**

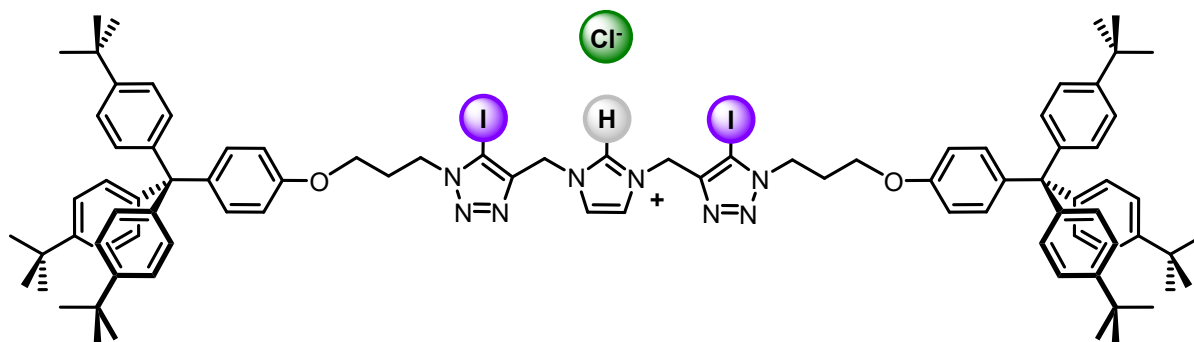

Stopper azide **2** (0.069 g, 0.117 mmol) was dissolved in dry degassed THF (2 mL) and the reaction vessel covered with foil.  $\text{Cu}(\text{ClO}_4)_2 \cdot 6\text{H}_2\text{O}$  (0.079 g, 0.107 mmol) and NaI (0.064 g, 0.426 mmol) were added and stirred under  $\text{N}_2$  for 5 mins. TBTA (0.006 g, 0.011 mmol) was added and stirred under  $\text{N}_2$  for 5 mins. DBU (0.016 g, 0.107 mmol) and imidazolium–alkyne **6·PF<sub>6</sub>** (0.100 g, 0.107 mmol) were added in order and the mixture was stirred at room temperature for 18 hours, after which, the reaction mixture was diluted with DCM (50 mL). The organics were washed with  $\text{NH}_4\text{OH}_{(\text{aq})}$  (3 × 30 mL),  $\text{H}_2\text{O}$  (30 mL) and brine (2 × 30 mL) and dried over  $\text{MgSO}_4$  and filtered. To the crude reaction mixture TFA (0.5 mL) was added and stirred for 30 mins. The solvent and excess TFA were removed *in vacuo* and the reaction mixture was purified *via* silica gel column chromatography (DCM/MeOH 95:5). and subjected to the anion exchange protocol. The solvent was removed *in vacuo* to afford XB imidazolium–bis(iodotriazole) axle **8·Cl** (0.059 g, 35%).

**<sup>1</sup>H NMR** (400 MHz;  $\text{CDCl}_3$ )  $\delta$  (ppm): 11.02 (1H, s, NCHN-imidazolium), 7.25-7.19 (12H, m, ArH), 7.18 (2H, s, NCH-imidazolium), 7.09-7.03 (16H, m, ArH), 6.74-6.68 (4H, m, OArH), 5.68 (4H, s, NCH<sub>2</sub>-methylene), 4.54 (4H, t,  $J = 7.3$  Hz, NCH<sub>2</sub>CH<sub>2</sub>), 3.96 (4H, t,  $J = 5.6$  Hz, OCH<sub>2</sub>), 2.49-2.22 (4H, m, OCH<sub>2</sub>CH<sub>2</sub>), 1.29 (54H, s, *tert*-CH<sub>3</sub>); **<sup>13</sup>C NMR** (126 MHz;  $\text{CDCl}_3/\text{CD}_3\text{OD}$  1:1)  $\delta$  (ppm): 155.82, 147.94, 143.76, 143.66, 139.70, 131.82, 130.28, 123.63, 122.57, 112.60, 83.73, 77.35, 63.57, 62.64, 47.96, 44.49, 33.73, 30.67, 29.00; **HRESI-MS** (pos)  $\text{C}_{89}\text{H}_{105}\text{O}_2\text{N}_8\text{I}_2^+$  [M-Cl]<sup>+</sup> *calc.* 1571.6444, *found* 1571.64021.

**10·PF<sub>6</sub>**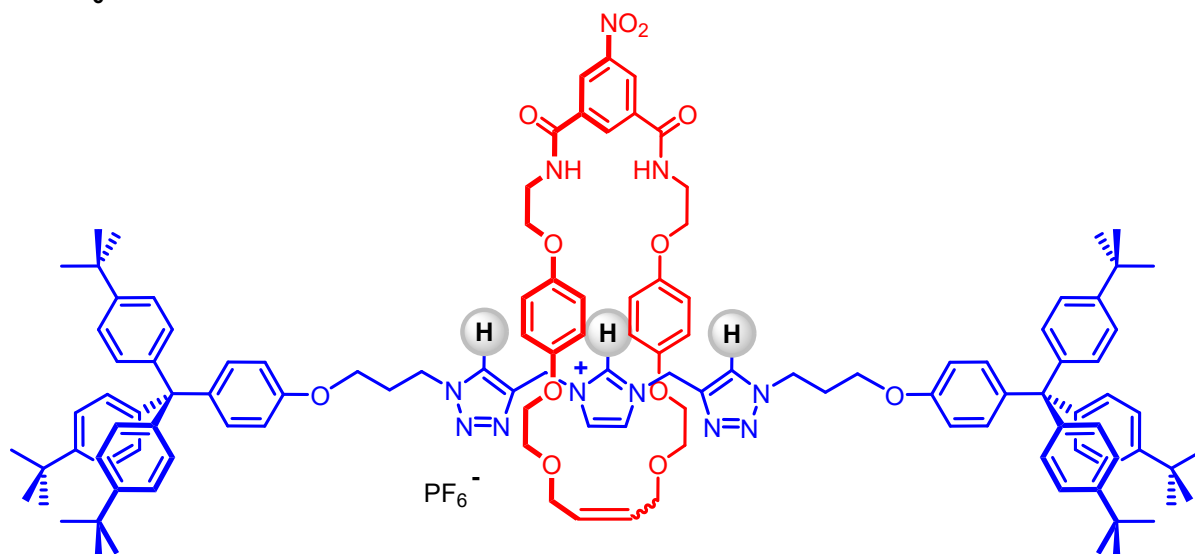

Imidazolium–bis(triazole) axle **7·Cl** (0.015 g, 0.011 mmol) and bis-vinyl macrocycle precursor **9** (0.011 g, 0.016 mmol) were dissolved in anhydrous DCM (6 mL) and stirred at room temperature for 30 mins. Grubbs' second generation catalyst (1.1 mg, 10% by weight) was added and the mixture was stirred for 48 hours, after which another portion of catalyst was added (1.1 mg) followed by stirring for a further 48 hours. The solvent was removed *in vacuo* and the crude reaction mixture purified *via* preparative TLC (EtOAc/MeOH 95:5 followed by DCM/MeOH 97:3) and subjected to the anion exchange protocol. The organics were dried over MgSO<sub>4</sub>, filtered and the solvent removed *in vacuo* to yield HB rotaxane **10·PF<sub>6</sub>** as an off white solid (0.008 g, 35%).

<sup>1</sup>H NMR (500 MHz; CDCl<sub>3</sub>/CD<sub>3</sub>OD/D<sub>2</sub>O 45:45:10) δ (ppm): 8.80 (2H, s, ArH-ext. macro.), 8.60 (1H, s, ArH-int. macro.), 7.78 (2H, s, CH-triazole axle), 7.29 (2H, s, NCH-imidazolium axle), 7.26-7.19 (12H, m, ArH-axle), 7.12-7.06 (16H, m, ArH-axle), 6.68-6.65 (4H, m, OArH-axle), 6.50 (4H, d, *J* = 9.0 Hz, ArH-macro.), 6.36 (4H, d, *J* = 9.0 Hz, ArH-macro), 5.78-5.73 (2H, m, CH-alkene macro.), 5.20 (4H, s, NCH<sub>2</sub>-methylene axle), 4.32 (4H, t, *J* = 6.9 Hz, NCH<sub>2</sub>CH<sub>2</sub>-axle), 3.99 (4H, t, *J* = 4.9 Hz, CH<sub>2</sub>-macro.), 3.93-3.91 (4H, m, CH<sub>2</sub>-macro.), 3.83-3.80 (4H, m, CH<sub>2</sub>-macro.), 3.79-3.73 (8H, m, CH<sub>2</sub>-macro., OCH<sub>2</sub>-axle), 3.67-3.64 (4H, m, CH<sub>2</sub>-macro.), 2.13-2.09 (4H, m, OCH<sub>2</sub>CH<sub>2</sub>-axle), 1.29 (54H, s, tert-CH<sub>3</sub>); <sup>13</sup>C NMR (126 MHz; CDCl<sub>3</sub>) δ (ppm): 164.73, 156.30, 152.94, 152.21, 149.07, 148.48, 144.17, 140.35, 135.95, 132.46, 130.84, 130.81, 129.62, 126.51, 125.13, 124.21, 121.96, 114.96, 114.48, 113.04, 71.12, 69.52, 67.83, 66.24, 63.97, 63.18, 47.83, 40.64, 34.44, 31.52, 30.08, 29.85, 22.85 (one peak missing, presumed overlapped); HRESI-MS (pos) C<sub>121</sub>H<sub>142</sub>O<sub>12</sub>N<sub>11</sub> *m/z*: [M-A]<sup>+</sup> calc. 1941.08340, found 1941.08375.

## 11·PF<sub>6</sub>

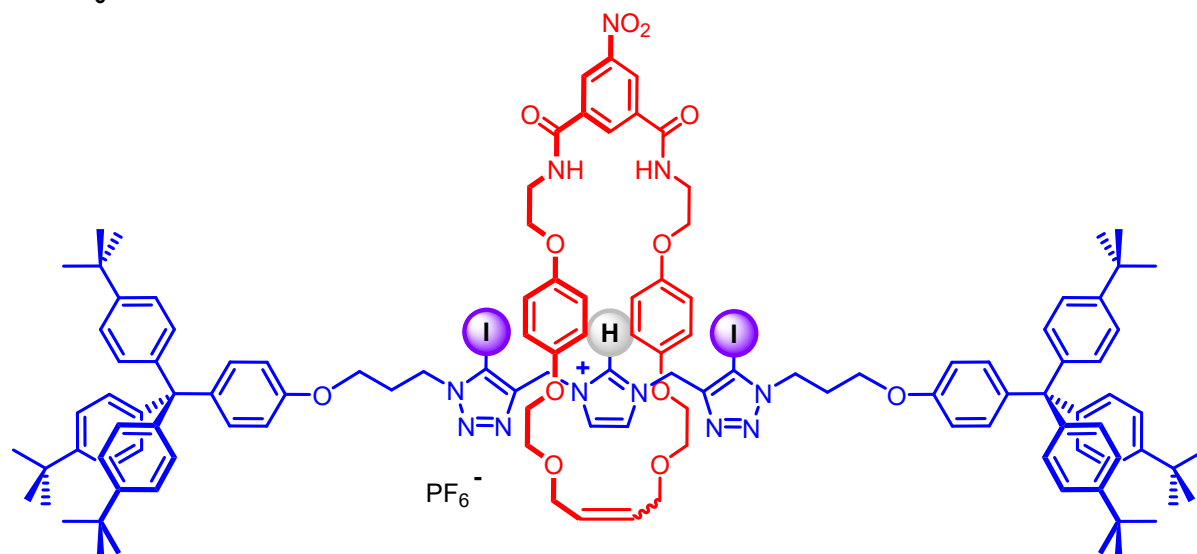

Imidazolium–bis(triazole) axle **7·Cl** (0.040 g, 0.025 mmol) and bis-vinyl macrocycle precursor **9** (0.024 g, 0.037 mmol) were dissolved in anhydrous DCM (15 mL) and stirred at room temperature for 30 mins. Grubbs' second generation catalyst (2.4 mg, 10% by weight) was added and the mixture was stirred for 48 hours, after which another portion of catalyst was added (2.4 mg) followed by stirring for a further 48 hours. The solvent was removed *in vacuo* and the crude reaction mixture purified *via* preparative TLC (EtOAc/MeOH 95:5 followed by DCM/MeOH 97:3). The product was dissolved in DCM (10 mL) and subjected to the anion exchange protocol. The organics were dried over MgSO<sub>4</sub>, filtered and the solvent removed *in vacuo* to yield XB rotaxane **11·PF<sub>6</sub>** as an off white solid (0.014 g, 24%).

<sup>1</sup>H NMR (500 MHz; CDCl<sub>3</sub>/CD<sub>3</sub>OD/D<sub>2</sub>O 45:45:10) δ (ppm): 8.82 (2H, s, ArH-ext. macro.), 8.75 (1H, s, ArH-int. macro.), 7.43 (2H, s, NCH-imidazolium axle), 7.30-7.18 (12H, m, ArH-axle), 7.11-7.05 (16H, m, ArH-axle), 6.69-6.64 (4H, m, OArH-axle), 6.43 (4H, d, *J* = 9.1 Hz, ArH-macro), 6.35 (4H, d, *J* = 9.0 Hz, ArH-macro), 5.87-5.82 (2H, m, CH-alkene macro.), 5.17 (4H, s, NCH<sub>2</sub>-methylene axle), 4.26 (4H, t, *J* = 6.9 Hz, NCH<sub>2</sub>CH<sub>2</sub>-axle), 4.03-3.94 (8H, m, CH<sub>2</sub>-macro.), 3.88-3.82 (4H, m, CH<sub>2</sub>-macro.), 3.80-3.72 (8H, m, CH<sub>2</sub>-macro., OCH<sub>2</sub>-axle), 3.71-3.66 (4H, m, CH<sub>2</sub>-macro.), 2.09 (4H, t, *J* = 6.7 Hz, OCH<sub>2</sub>CH<sub>2</sub>-axle), 1.29 (54H, s, tert-CH<sub>3</sub>); <sup>13</sup>C NMR (126 MHz; CDCl<sub>3</sub>) δ (ppm): 164.98, 156.26, 153.12, 152.35, 148.87, 148.51, 144.17, 143.82, 140.36, 136.67, 135.56, 132.46, 130.82, 129.99, 126.21, 124.22, 122.60, 115.61, 114.66, 113.12, 71.27, 69.66, 67.67, 66.56, 63.85, 63.19, 48.82, 44.60, 40.23, 34.45, 31.53, 22.85 (two peaks missing, presumed overlapped); HRESI-MS (pos) C<sub>121</sub>H<sub>140</sub>O<sub>12</sub>N<sub>11</sub>I<sub>2</sub> *m/z*: [M-A]<sup>+</sup> *calc.* 2192.87668, *found* 2192.87577.

## References

- [1] J. Warnan, Y. Pellegrin, E. Blart, F. Odobel, *Chem. Commun.* 2011, 48, 675–677.
- [2] V. Aucagne, K. D. Hänni, D. A. Leigh, P. J. Lusby, D. B. Walker, *J. Am. Chem. Soc.* 2006, 128, 2186–2187.
- [3] M. R. Sambrook, P. D. Beer, M. D. Lankshear, R. F. Ludlow, J. A. Wisner, *Org. Biomol. Chem.* 2006, 4, 1529–1538.
